# Supplementary material for: MicroRNA Signature Characterizes Primary Tumors That Metastasize in an Esophageal Adenocarcinoma Rat Model
Source: PubMed Central journal article supplement (PMC4380408; doi:10.1371/journal.pone.0122375), 2015-03-31
Supplement: pone.0122375.s004.pdf [file pone.0122375.s004.pdf]

**S5\_Table .** Fold change in gene expression and p-value of the 4 miRNA signature and downstream/upstream targets

| <b>Fold Change</b> | <b>p-value</b> | <b>ID</b>       | <b>Symbol</b>                                 | <b>Location</b> | <b>Type(s)</b>          |
|--------------------|----------------|-----------------|-----------------------------------------------|-----------------|-------------------------|
| -14.505            | 1.00E-04       | rno-miR-32-5p   | miR-92a-3p (and other miRNAs w/seed AUUGCAC)  | Cytoplasm       | mature microRNA         |
| -12.584            | 1.81E-02       | rno-miR-451-5p  | miR-451a (and other miRNAs w/seed AACCGUU)    | Cytoplasm       | mature microRNA         |
| -9.394             | 2.24E-03       | rno-miR-141-3p  | miR-141-3p (and other miRNAs w/seed AACACUG)  | Cytoplasm       | mature microRNA         |
| -9.33              | 3.05E-02       | rno-miR-133b-3p | miR-133a-3p (and other miRNAs w/seed UUGGUCC) | Cytoplasm       | mature microRNA         |
| 1.444              | 1.10E-01       | BCL2            | BCL2                                          | Cytoplasm       | transporter             |
| 1.611              | 1.30E-02       | KRAS            | KRAS                                          | Cytoplasm       | enzyme                  |
| 1.767              | 5.20E-03       | CDKN1B          | CDKN1B                                        | Nucleus         | kinase                  |
| 1.824              | 2.62E-04       | AGO2            | AGO2                                          | Cytoplasm       | translation regulator   |
| 2                  | 3.94E-02       | BCL2L11         | BCL2L11                                       | Cytoplasm       | other                   |
| 2.013              | 2.61E-04       | AKT1            | AKT1                                          | Cytoplasm       | kinase                  |
| 2.177              | 1.08E-02       | ZEB2            | ZEB2                                          | Nucleus         | transcription regulator |
